# Supplementary material
Source: PubMed Central journal article supplement (PMC8072402)
Supplement: pnas.2010057118.sapp.pdf [file pnas.2010057118.sapp.pdf]

1

## 2 **Supplementary Information for**

3 **Selection for cooperativity causes epistasis predominately between native contacts and**  
4 **enables epistasis based structure reconstruction**

5 **R. Charlotte Eccleston, David D. Pollock and Richard A. Goldstein**

6 **Richard A. Goldstein.**

7 **E-mail: [r.goldstein@ucl.ac.uk](mailto:r.goldstein@ucl.ac.uk)**

### 8 **This PDF file includes:**

9     Supplementary text

10    SI References

## 11 Supporting Information Text

12 **A random coil model for the generation intermediate structures.** We used a random coil model (1, 2) to generate a large number  
13 of structures for each of the partially folded and unfolded states. For a fully unfolded structure, a point is generated at random  
14 with respect to the world origin (0,0,0) and the world coordinate system  $\hat{x}_0 = [1, 0, 1]$ ,  $\hat{y}_0 = [0, 1, 0]$  and  $\hat{z}_0 = [0, 0, 1]$ . A point  
15 is then chosen at random from within the sphere of radius  $r$ , where  $r=7\text{\AA}$ , by choosing a value between  $3 - 7\text{\AA}$  to define the  
16 bond length  $l_1$  from the world origin to the location of the first beta carbon atom  $C_{\beta,1}$ , where the random distribution is  
17 biased outwards to account for the volume effects of the sphere. A value for the azimuthal angle  $\phi_1$  is chosen from the uniform  
18 distribution between 0 and  $2\pi$ . This angle is defined as the angle between positive y-axis and the projection of the bond vector  
19  $l_1$  in the y-z plane. A value for the polar angle  $\theta_1$ , defined as the angle from the positive x-axis and the bond vector  $l_1$ , is  
20 chosen at random between 0 and  $\pi$  from a distribution tapering at the poles.

21 These three values ( $l_1, \theta_1, \phi_1$ ) define the point  $p_1$ , which is the location of the first beta carbon atom  $C_{\beta,1}$  of the random  
22 protein structure. To define the location of the second beta carbon atom  $C_{\beta,2}$ , the unit vector in the direction of the vector  
23  $l_1$  is set to be the unit vector in the direction of the x-axis ( $\hat{x}_1$ ) of a rotated coordinate system  $S_1$ . The y-axis of this new  
24 coordinate system is found by taking the cross product of  $\hat{x}_1$  and a random vector in the plane  $\hat{x}_0 - \hat{x}_1$ , conditional on the  
25 angle between this new y-axis and  $\hat{x}_0$  being acute. The vector  $y_1$  can then be normalised to find the unit vector in the direction  
26 of  $y_1$ ,  $\hat{y}_1$ . The unit vector in the direction of the z-axis of this new coordinate system can be found by normalising the vector  
27 obtained as a result of the cross-product of  $\hat{x}_1$  and  $\hat{y}_1$ . In the same way as before, the values of  $r_2, \theta_2$  and  $\phi_2$  are found at  
28 random to define the location  $p_2$  of  $C_{\beta,2}$  with respect to the new coordinate system  $S_1$ . To get the coordinates of this point in  
29 the world coordinate system we can use the rotation matrix  $\mathbf{R}_{1,0}$ , defined as:

$$30 \quad \mathbf{R}_{1,0} = \begin{bmatrix} R_{XX} & R_{XY} & R_{XZ} \\ R_{YX} & R_{YY} & R_{YZ} \\ R_{ZX} & R_{ZY} & R_{ZZ} \end{bmatrix}$$

31  $R_{XX}$  is the component of  $\hat{x}_1$  in the direction of the world coordinate system x-axis,  $R_{XY}$  is the component in the direction of  
32 the world coordinate system y-axis and  $R_{XZ}$  is the component in the direction of the world coordinate system z-axis.  $R_{Yi}$  and  
33  $R_{Zi}$  represent the components of  $\hat{y}_1$  and  $\hat{z}_1$  in the direction of the three world axis. The coordinates of the point  $p_2$  in the  
34 world coordinate system  $p_2^*$  can then be found as follows:

$$35 \quad p_2^* = p_2 \mathbf{R}_{1,0} + C_{1,0}, \quad [1]$$

36 where  $C_{1,0}$  is the vector joining the world origin to the origin of the coordinate system  $S_1$ . When generating structures of fully  
37 denatured proteins, this process is repeated  $N - 2$  times, where  $N$  is the number of amino acids in the protein, to obtain the  
38 coordinates of each amino acid in the world coordinate system. When generating structures for each of the intermediate states,  
39 this process if carried out for the section(s) of the protein which are allowed to unfold. At the end of each unfolded segment,  
40 the coordinates of the fixed sections from the PDB file coordinates are translated relative to the position of the final unfolded  
41 residue. Additionally, each time a new point is generated, it is only accepted if it does not overlap with any of the previous  
42 points (i.e. if the distance between the new point and all other points in the protein is greater than  $3\text{\AA}$ ), otherwise a new point  
43 is chosen until the condition is satisfied and only then can the next point be generated.

## 44 References

- 45 1. P.J. Flory, *Principles of Polymer Chemistry*. (Cornell University Press), (1953).
- 46 2. P.J. Flory, *Statistical Mechanics of Chain Molecules*. (Hanser Gardner Publications), (1989).
